# Supplementary material
Source: PubMed Central journal article supplement (PMC5794015)

Classification  
 Female Day 1  
 Female Day 5  
 Male Day 1  
 Male Day 5

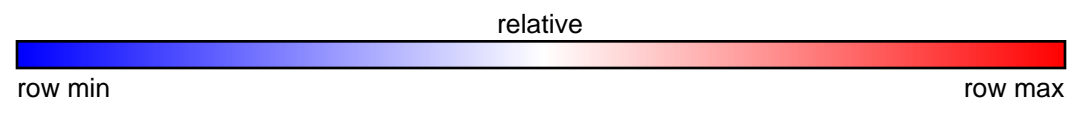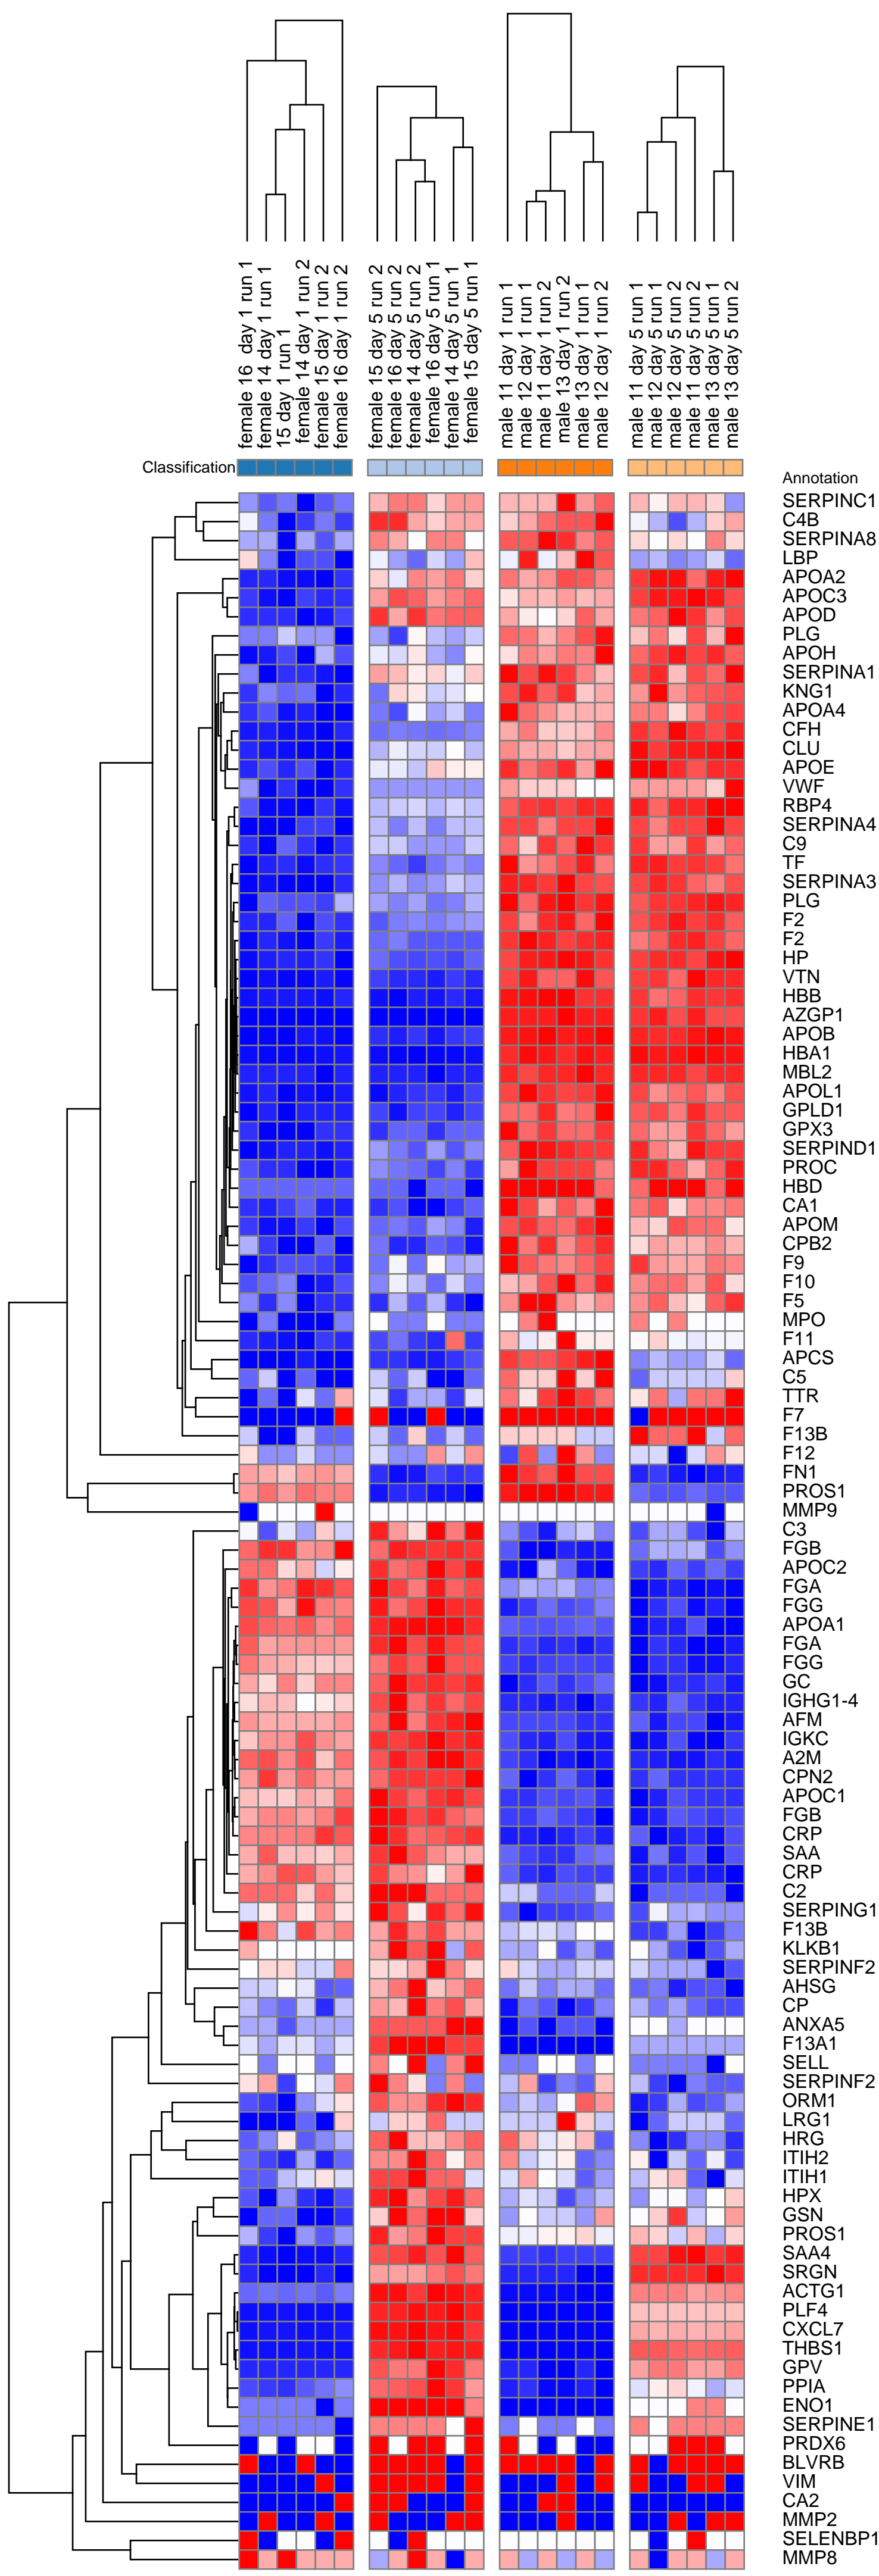

Supplement: NIHMS936266-supplement-Supp_1.pdf [file NIHMS936266-supplement-Supp_1.pdf]
